# Supplementary material for: Living Environment and Intrinsic Capacity among Chinese Older Adults: A cross-sectional study
Source: Research Square preprint supplement (doi:10.21203/rs.3.rs-6776806/v1), 2025-06-12
Supplement: Supplementary file 1 [file a7c1735592c715a34cde6e86.docx]

**Covariates**

We adjusted for the following potential confounders in all models: Sex: male; female; Age: 60-69, 70-79, 80-; Marry status, Marital status was operationalized as partner status, defined as respondents reporting "married" (currently married), or "cohabiting with a romantic partner," while all other responses (e.g., single, divorced, widowed, or "prefer not to say") were classified as no partner. Education: Educational attainment was categorized into three groups: primary education or less, junior high and senior high school, and college or higher. Place of residence: urban areas; rural areas. Region: geographic regions were categorized as Eastern (including provinces: Beijing, Shanghai, Jiangsu, etc.), Central (e.g., Henan, Hubei, Hunan), and Western (e.g., Sichuan, Chongqing, Gansu). Labour force status: Employment status was dichotomized as working and retired. Smoking and drinking: Smoking status and alcohol consumption were each dichotomized as current smokers/drinkers (yes/no). Sleep night and sleep nap: Sleep duration was categorized into healthy sleep time and unhealthy sleep time based on established guidelines. For nocturnal sleep, healthy sleep time was defined as 6–8 hours per night, while unhealthy sleep time included other durations. For midday sleep, healthy sleep time was defined as 35-75 minutes per day, while unhealthy sleep time included other durations. Chronic number: none, one, two and above two. Children contact: Contact with children was defined as participants reporting at least one face-to-face interaction or phone call with their children per week. This binary classification was operationalized as a categorical variable (yes/no). Social contact: Participants were asked whether they participated in any of the following social activities. Those who answered "no" to all listed activities were defined as having no social activity participation, while those who answered "yes" to at least one activity were classified as having social activity participation. Insurance: Health insurance participation was assessed by asking participants whether they were currently enrolled in any form of health insurance. Respondents who reported being enrolled in health insurance (including public or private plans) were classified as insured, while those who reported no enrollment were classified as uninsured. House wealth: Family wealth level was assessed using a proxy measure due to the high prevalence of missing data on household annual income, particularly in rural areas. Specifically, we calculated the average annual income per child for each participant as the total annual income of their children divided by the number of children. This value was then categorized into quartiles (Q1–Q4), where Q1 represented the lowest quartile and Q4 represented the highest quartile of average child income. These quartiles were used as a proxy for the participant's family wealth level in subsequent analyses.

**The situation of missing values**

| Missing situation | | | |
| --- | --- | --- | --- |
| **Variable** | **Missing** | **toatl** | **Percent Missing** |
| **IC score** | 0 | 6048 | 0 |
| **Living score** | 0 | 6048 | 0 |
| **Sex** | 0 | 6048 | 0 |
| **Age** | 14 | 6048 | 0.22 |
| **Marry** | 1 | 6048 | 0.02 |
| **Education** | 0 | 6048 | 0 |
| **Place of Residence** | 0 | 6048 | 0 |
| **Region** | 0 | 6048 | 0 |
| **Labour force status** | 83 | 6048 | 1.3 |
| **Smoking** | 5 | 6048 | 0.08 |
| **Drinking** | 3 | 6048 | 0.05 |
| **Sleep-night** | 109 | 6048 | 1.7 |
| **Sleep-nap** | 41 | 6048 | 0.64 |
| **Chronic number** | 283 | 6048 | 4.42 |
| **Insurance** | 328 | 6048 | 5.12 |
| **Social contact** | 0 | 6048 | 0 |
| **Children_contact** | 1230 | 6048 | 19.19 |
| **House wealth** | 970 | 6048 | 15.15 |

**Results of the Robustness Test**

**The results of original-data regression:**

| **Regression results of original data** | | | | | | |
| --- | --- | --- | --- | --- | --- | --- |
| **Variable** | **Coefficient** | **Se** | **t** | **95%CI LL** | **95%CI UL** | ***P value*** |
| **Living score** | 0.065445 | 0.012996 | 5.04 | 0.04 | 0.0909 | <0.001 |
| **Sex** |  |  |  |  |  |  |
| Female |  |  |  |  |  |  |
| Male | 0.361905 | 0.042717 | 8.47 | 0.2782 | 0.4457 | <0.001 |
| **Age** |  |  |  |  |  |  |
| 60-69 |  |  |  |  |  |  |
| 70-79 | -0.135482 | 0.039306 | -3.45 | -0.2125 | -0.0584 | 0.001 |
| 80 and older | -0.38607 | 0.081384 | -4.74 | -0.5456 | -0.2265 | <0.001 |
| **Marry** |  |  |  |  |  |  |
| Unmarried and others |  |  |  |  |  |  |
| Married and partnered | 0.096225 | 0.045483 | 2.12 | 0.0071 | 0.1854 | 0.034 |
| **Education** |  |  |  |  |  |  |
| Below |  |  |  |  |  |  |
| Secondary school | 0.243157 | 0.082695 | 2.94 | 0.081 | 0.4053 | 0.003 |
| College and above | 0.110512 | 0.181328 | 0.61 | -0.245 | 0.466 | 0.542 |
| **Place of Residence** |  |  |  |  |  |  |
| Urban |  |  |  |  |  |  |
| Rural | -0.089944 | 0.039918 | -2.25 | -0.1682 | -0.0117 | 0.024 |
| **Region** |  |  |  |  |  |  |
| Middle |  |  |  |  |  |  |
| West | 0.043823 | 0.052378 | 0.84 | -0.0589 | 0.1465 | 0.403 |
| East | 0.025695 | 0.048865 | 0.53 | -0.0701 | 0.1215 | 0.599 |
| **Labour force status** |  |  |  |  |  |  |
| Not working |  |  |  |  |  |  |
| Working | 0.196733 | 0.037959 | 5.18 | 0.1223 | 0.2712 | <0.001 |
| **Smoking** |  |  |  |  |  |  |
| No |  |  |  |  |  |  |
| Yes | 0.020823 | 0.04355 | 0.48 | -0.0646 | 0.1062 | 0.633 |
| **Drinking** |  |  |  |  |  |  |
| No |  |  |  |  |  |  |
| Yes | 0.060414 | 0.039641 | 1.52 | -0.0173 | 0.1381 | 0.128 |
| **Sleep-night** |  |  |  |  |  |  |
| Others |  |  |  |  |  |  |
| 6h<=Sleep night <=8h | 0.154656 | 0.034682 | 4.46 | 0.0867 | 0.2227 | <0.001 |
| **Sleep-nap** |  |  |  |  |  |  |
| Others |  |  |  |  |  |  |
| 30min<=Sleep nap <=75min | 0.03125 | 0.036228 | 0.86 | -0.0398 | 0.1023 | 0.388 |
| **Chronic number** |  |  |  |  |  |  |
| None |  |  |  |  |  |  |
| One | -0.234763 | 0.054686 | -4.29 | -0.342 | -0.1275 | <0.001 |
| Two | -0.327303 | 0.055809 | -5.86 | -0.4367 | -0.2179 | <0.001 |
| Above two | -0.679411 | 0.051751 | -13.13 | -0.7809 | -0.578 | <0.001 |
| **Insurance** |  |  |  |  |  |  |
| No |  |  |  |  |  |  |
| Yes | 0.038622 | 0.065275 | 0.59 | -0.0894 | 0.1666 | 0.554 |
| **Social contact** |  |  |  |  |  |  |
| No |  |  |  |  |  |  |
| Yes | 0.084056 | 0.034793 | 2.42 | 0.0158 | 0.1523 | 0.016 |
| **Children contact** |  |  |  |  |  |  |
| No |  |  |  |  |  |  |
| Yes | 0.05703 | 0.056792 | 1 | -0.0543 | 0.1684 | 0.315 |
| **House wealth** |  |  |  |  |  |  |
| Group1  (most deprived) |  |  |  |  |  |  |
| Group2 | 0.19137 | 0.047866 | 4 | 0.0975 | 0.2852 | <0.001 |
| Group3 | 0.249268 | 0.049123 | 5.07 | 0.153 | 0.3456 | <0.001 |
| Group4  (most affluent) | 0.370477 | 0.050217 | 7.38 | 0.272 | 0.4689 | <0.001 |

**The results of recoding of cognition:**

| **Recoding of cognition** | | | | | | |
| --- | --- | --- | --- | --- | --- | --- |
| **Variable** | **Coefficient** | **Se** | **t** | **95%CI LL** | **95%CI UL** | ***P value*** |
| **Living score** | 0.733835 | 0.005347 | 137.23 | 0.7234 | 0.7443 | <0.001 |
| **Sex** |  |  |  |  |  |  |
| Female |  |  |  |  |  |  |
| Male | -0.026306 | 0.017576 | -1.5 | -0.0608 | 0.0082 | 0.135 |
| **Age** |  |  |  |  |  |  |
| 60-69 |  |  |  |  |  |  |
| 70-79 | 0.007313 | 0.016173 | 0.45 | -0.0244 | 0.039 | 0.651 |
| 80 and older | 0.000659 | 0.033486 | 0.02 | -0.065 | 0.0663 | 0.984 |
| **Marry** |  |  |  |  |  |  |
| Unmarried and others |  |  |  |  |  |  |
| Married and partnered | 0.039272 | 0.018714 | 2.1 | 0.0026 | 0.076 | 0.036 |
| **Education** |  |  |  |  |  |  |
| Below |  |  |  |  |  |  |
| Secondary school | 0.044796 | 0.034025 | 1.32 | -0.0219 | 0.1115 | 0.188 |
| College and above | 0.110338 | 0.074608 | 1.48 | -0.0359 | 0.2566 | 0.139 |
| **Place of Residence** |  |  |  |  |  |  |
| Urban |  |  |  |  |  |  |
| Rural | -0.006667 | 0.016424 | -0.41 | -0.0389 | 0.0255 | 0.685 |
| **Region** |  |  |  |  |  |  |
| Middle |  |  |  |  |  |  |
| West | 0.12027 | 0.021551 | 5.58 | 0.078 | 0.1625 | <0.001 |
| East | 0.029402 | 0.020106 | 1.46 | -0.01 | 0.0688 | 0.144 |
| **Labour force status** |  |  |  |  |  |  |
| Not working |  |  |  |  |  |  |
| Working | 0.025801 | 0.015618 | 1.65 | -0.0048 | 0.0564 | 0.099 |
| **Smoking** |  |  |  |  |  |  |
| No |  |  |  |  |  |  |
| Yes | 0.008579 | 0.017919 | 0.48 | -0.0266 | 0.0437 | 0.632 |
| **Drinking** |  |  |  |  |  |  |
| No |  |  |  |  |  |  |
| Yes | 0.01666 | 0.01631 | 1.02 | -0.0153 | 0.0486 | 0.307 |
| **Sleep-night** |  |  |  |  |  |  |
| Others |  |  |  |  |  |  |
| 6h<=Sleep night <=8h | 0.001639 | 0.01427 | 0.11 | -0.0263 | 0.0296 | 0.909 |
| **Sleep-nap** |  |  |  |  |  |  |
| Others |  |  |  |  |  |  |
| 30min<=Sleep nap <=75min | 0.015517 | 0.014906 | 1.04 | -0.0137 | 0.0447 | 0.298 |
| **Chronic number** |  |  |  |  |  |  |
| None |  |  |  |  |  |  |
| One | 0.027218 | 0.022501 | 1.21 | -0.0169 | 0.0713 | 0.226 |
| Two | 0.005515 | 0.022963 | 0.24 | -0.0395 | 0.0505 | 0.81 |
| Above two | 0.022745 | 0.021293 | 1.07 | -0.019 | 0.0645 | 0.286 |
| **Insurance** |  |  |  |  |  |  |
| No |  |  |  |  |  |  |
| Yes | 0.021162 | 0.026858 | 0.79 | -0.0315 | 0.0738 | 0.431 |
| **Social contact** |  |  |  |  |  |  |
| No |  |  |  |  |  |  |
| Yes | -0.055214 | 0.014316 | -3.86 | -0.0833 | -0.0271 | <0.001 |
| **Children contact** |  |  |  |  |  |  |
| No |  |  |  |  |  |  |
| Yes | 0.036724 | 0.023367 | 1.57 | -0.0091 | 0.0825 | 0.116 |
| **House wealth** |  |  |  |  |  |  |
| Group1  (most deprived) |  |  |  |  |  |  |
| Group2 | -0.017516 | 0.019695 | -0.89 | -0.0561 | 0.0211 | 0.374 |
| Group3 | 0.00725 | 0.020212 | 0.36 | -0.0324 | 0.0469 | 0.72 |
| Group4  (most affluent) | 0.030493 | 0.020662 | 1.48 | -0.01 | 0.071 | 0.14 |

**The results of recoding of clean energy:**

| **Recoding of clean energy** | | | | | | |
| --- | --- | --- | --- | --- | --- | --- |
| **Variable** | **Coefficient** | **Se** | **t** | **95%CI LL** | **95%CI UL** | ***P value*** |
| **Living score** | 0.072988 | 0.013823 | 5.28 | 0.0459 | 0.1001 | <0.001 |
| **Sex** |  |  |  |  |  |  |
| Female |  |  |  |  |  |  |
| Male | 0.522388 | 0.045435 | 11.5 | 0.4333 | 0.6115 | <0.001 |
| **Age** |  |  |  |  |  |  |
| 60-69 |  |  |  |  |  |  |
| 70-79 | -0.20706 | 0.041808 | -4.95 | -0.289 | -0.1251 | <0.001 |
| 80 and older | -0.55885 | 0.086563 | -6.46 | -0.7286 | -0.3891 | <0.001 |
| **Marry** |  |  |  |  |  |  |
| Unmarried and others |  |  |  |  |  |  |
| Married and partnered | 0.143645 | 0.048377 | 2.97 | 0.0488 | 0.2385 | 0.003 |
| **Education** |  |  |  |  |  |  |
| Below |  |  |  |  |  |  |
| Secondary school | 0.325295 | 0.087957 | 3.7 | 0.1528 | 0.4977 | <0.001 |
| College and above | 0.192257 | 0.192866 | 1 | -0.1859 | 0.5704 | 0.319 |
| **Place of Residence** |  |  |  |  |  |  |
| Urban |  |  |  |  |  |  |
| Rural | -0.167516 | 0.042458 | -3.95 | -0.2508 | -0.0843 | <0.001 |
| **Region** |  |  |  |  |  |  |
| Middle |  |  |  |  |  |  |
| West | 0.02706 | 0.055711 | 0.49 | -0.0822 | 0.1363 | 0.627 |
| East | 0.028699 | 0.051974 | 0.55 | -0.0732 | 0.1306 | 0.581 |
| **Labour force status** |  |  |  |  |  |  |
| Not working |  |  |  |  |  |  |
| Working | 0.219461 | 0.040374 | 5.44 | 0.1403 | 0.2986 | <0.001 |
| **Smoking** |  |  |  |  |  |  |
| No |  |  |  |  |  |  |
| Yes | -0.007836 | 0.046322 | -0.17 | -0.0987 | 0.083 | 0.866 |
| **Drinking** |  |  |  |  |  |  |
| No |  |  |  |  |  |  |
| Yes | 0.0895 | 0.042163 | 2.12 | 0.0068 | 0.1722 | 0.034 |
| **Sleep-night** |  |  |  |  |  |  |
| Others |  |  |  |  |  |  |
| 6h<=Sleep night <=8h | 0.189768 | 0.036889 | 5.14 | 0.1174 | 0.2621 | <0.001 |
| **Sleep-nap** |  |  |  |  |  |  |
| Others |  |  |  |  |  |  |
| 30min<=Sleep nap <=75min | 0.035656 | 0.038533 | 0.93 | -0.0399 | 0.1112 | 0.355 |
| **Chronic number** |  |  |  |  |  |  |
| None |  |  |  |  |  |  |
| One | -0.237614 | 0.058166 | -4.09 | -0.3517 | -0.1236 | <0.001 |
| Two | -0.307734 | 0.05936 | -5.18 | -0.4241 | -0.1914 | <0.001 |
| Above two | -0.637573 | 0.055044 | -11.58 | -0.7455 | -0.5297 | <0.001 |
| **Insurance** |  |  |  |  |  |  |
| No |  |  |  |  |  |  |
| Yes | 0.141938 | 0.069429 | 2.04 | 0.0058 | 0.2781 | 0.041 |
| **Social contact** |  |  |  |  |  |  |
| No |  |  |  |  |  |  |
| Yes | 0.155244 | 0.037007 | 4.2 | 0.0827 | 0.2278 | <0.001 |
| **Children contact** |  |  |  |  |  |  |
| No |  |  |  |  |  |  |
| Yes | 0.061471 | 0.060406 | 1.02 | -0.057 | 0.1799 | 0.309 |
| **House wealth** |  |  |  |  |  |  |
| Group1  (most deprived) |  |  |  |  |  |  |
| Group2 | 0.211902 | 0.050912 | 4.16 | 0.1121 | 0.3117 | <0.001 |
| Group3 | 0.319767 | 0.052249 | 6.12 | 0.2173 | 0.4222 | <0.001 |
| Group4  (most affluent) | 0.452392 | 0.053412 | 8.47 | 0.3477 | 0.5571 | <0.001 |
